# COVID-19 national lockdown in Morocco: impacts on air quality and public health

Kenza Khomsi<sup>1,2\*</sup>, Houda Najmi<sup>1</sup>, Hassan Amghar<sup>1</sup>, Youssef Chelhaoui<sup>1</sup>, Zineb Souhaili<sup>2</sup>

<sup>1</sup> Air Quality Department, National Climate Center, General Directorate of Meteorology, Boulevard Mohamed Tayeb Naciri, Hay Hassani B.P. 8106 Oasis-Casablanca, Morocco

<sup>2</sup>Laboratory of Drugs Science, Biomedical and Biotechnological Research. Faculty of Medicine and Pharmacy. Hassan II University; Ain Chock. Casablanca; P.B. 5696. Morocco

\*Corresponding Author: Kenza KHOMSI, [k.khomsi@gmail.com](mailto:k.khomsi@gmail.com), General Directorate of Meteorology, Boulevard Mohamed Tayeb Naciri, Hay Hassani B.P. 8106 Oasis-Casablanca, Morocco

## Abstract

On the 20<sup>th</sup> April 2020, the end date of the first strict lockdown period in Morocco, 2 403 410 cases of the corona Virus were confirmed globally. The number of Morocco confirmed cases attended 2990, while 12 746 were suspected and 143 deaths were recorded. Due to the pandemic of coronavirus disease 2019 worldwide and in Morocco, almost all avoidable activities in the country were prohibited since the kingdom announced activities reduction on March 16, 2020 and then general lockdown with reduced industrial activities on March 20, 2020.

This study aims at comparing the air quality status in Casablanca and Marrakech, two large cities from Morocco, before the pandemic and during the lockdown situation to show whether COVID-19 compelled-anthropogenic activities lockdown may have saved lives by restraining ambient air pollution than by preventing infection.

We found that, during the quarantine, NO<sub>2</sub> dropped by -12 µg/m<sup>3</sup> in Casablanca and -7 µg/m<sup>3</sup> in Marrakech. PM<sub>2.5</sub> dropped by -18 µg/m<sup>3</sup> in Casablanca and -14 µg/m<sup>3</sup> in Marrakech. CO dropped by -0.04 mg/m<sup>3</sup> in Casablanca and -0.12 mg/m<sup>3</sup> in Marrakech. This air pollution reduction had created human health benefits and had reduced mortality and saved lives mainly from cardiovascular diseases.

---

\* E-mail address: [k.khomsi@gmail.com](mailto:k.khomsi@gmail.com)

NOTE: This preprint reports new research that has not been certified by peer review and should not be used to guide clinical practice.

26 **Keywords:** COVID -19; Air Quality; Lockdown; Morocco; Public Health; Mortality

## 27 **1. Introduction**

28 Coronavirus disease 2019 (COVID-19) is an infectious disease initially identified in the city of  
29 Wuhan in China on the 31<sup>st</sup> December 2019 (Khan and Naushad, 2020). On the 20<sup>th</sup> April 2020,  
30 COVID-19 has led to more than 165 000 deaths worldwide with a global mortality rate of 6.8%  
31 (WHO, 2020a). Due to the contagious nature of COVID-19, most countries declared the lockdown,  
32 hence businesses and industrial activities decreased, global air travel reduced and cars and trucks  
33 stayed off the roads (Isaifan, 2020; Martins, 2020; Wang et al., 2020).

34 Morocco reported the first COVID-19 case on the 2<sup>nd</sup> March 2020, 39 cases, and 1 death  
35 followed. Then the government announced the obligation of physical distancing and border  
36 closures on the 16<sup>th</sup> March 2020 and gathering places closed. The lockdown followed on the 20<sup>th</sup>  
37 March 2020. Since then, the unofficial transit going in and out of Moroccan cities was shut down,  
38 most transportation was prohibited and almost all avoidable outdoor human activities stopped all  
39 around the country. On the 20<sup>th</sup> April 2020, the end date of the first strict lockdown period, Morocco  
40 announced 2990 confirmed cases and 143 deaths, thus a mortality rate of 4.8% (Ministry of Health,  
41 2020).

42 Beyond the slowdown in the spread of the COVID-19 virus, the restrictive measures  
43 implemented by the authorities around the world have a second, less expected effect: that of  
44 reducing ambient air pollution which mortality rate has contributed to 7.6% of all deaths in 2016  
45 worldwide (Isaifan, 2020). In China, Nitrogen Dioxide (NO<sub>2</sub>) and carbon emissions dropped by 30  
46 and 25%, respectively (Isaifan, 2020). In India, the concentrations of Particulate Matter with a  
47 diameter of less than 10µm and 2.5µm (PM<sub>10</sub> and PM<sub>2.5</sub>) reduced by 50% and NO<sub>2</sub> has also shown  
48 considerable decline (Mahato et al., 2020). In Spain, the concentration levels of NO<sub>2</sub> have declined  
49 by 64% in major cities (Universitat Politècnica de València, 2020). In Northern Italy, a drastic  
50 reduction in NO<sub>2</sub> emissions was observed too (Martins, 2020). Emissions have also dropped in the

51 USA (Newburger, 2020). In the city of Salé in Morocco, PM<sub>10</sub> and NO<sub>2</sub> concentrations dropped  
52 respectively by 75% and 96% during the period between the 11<sup>th</sup> March and the 2<sup>nd</sup> April 2020  
53 (Otmani et al., 2020).

54 According to the World Health Organization (WHO), 4.2 million deaths have been caused by  
55 ambient air pollution worldwide in 2016. The latter is estimated to cause about 29% of lung cancer  
56 deaths, 24% of stroke deaths, 25% of heart disease deaths, and 43% of other lung diseases.  
57 Moreover, air pollution has attributed to 26% of respiratory infection deaths, 25% of chronic  
58 obstructive pulmonary disease (COPD) deaths, and about 17% of ischemic heart disease and stroke.  
59 It is noteworthy that chronic respiratory and cardiovascular diseases may be linked to COVID-19  
60 as the death rate caused by the virus is higher among those with these diseases (Isaifan, 2020;  
61 WHO, 2020b). As for Morocco, each year more than 13,000 deaths is due to air pollution. This  
62 represents about 7% of all deaths thus the 8<sup>th</sup> largest mortality risk factor. According to the global  
63 report “Toxic Air: The Price of Fossil Fuels” of the international NGO Greenpeace MENA,  
64 annually deaths due to air quality degradation in Morocco is estimated at 5,100 in 2018 (Farrow,  
65 A., Miller, K.A. & Myllyvirta, 2020).

66 Obviously, COVID-19 is a treat for public health, nevertheless, the accompanying lockdown  
67 measures, instigating improved air quality, may have positive effects on human life and well-being.  
68 For instance, Chen et. al estimate that improved air quality in China, during the quarantine period,  
69 avoided a total of 8911 NO<sub>2</sub>-related deaths and 3214 PM<sub>2.5</sub>-related deaths (Chen et al., 2020).

70 The present study has started in April 2020 to highlight the impacts of COVID-19 lockdown on  
71 air pollution levels in Morocco and the potentially avoided cause-specific mortality during  
72 population quarantine episode. We have adopted the same approach as (Chen et al., 2020). To the  
73 best of our knowledge, it reports on the first case study that links the COVID-19 to positive

74 consequences on health in Morocco and tries to verify whether this infection has saved people than  
75 it has killed so far.

76 The remainder of this paper starts with presenting the materials and methods including the study  
77 area, the used data and, the adopted approach. It then presents the found results and the discussion  
78 section.

## 79 **2. Materials and Methods**

### 80 **2.1. The study area**

81 Morocco is an African country located in the extreme northwest of the continent (Fig. 1). It is  
82 located in the southern part of the Mediterranean basin and is considered among the most  
83 vulnerable countries to climate variability and transboundary air pollution (Khomsi et al., 2020).  
84 Casablanca and Marrakech are the studied cities. They are, respectively, the first and the fourth  
85 populous cities in Morocco with more than 3,000,000 and 900,000 residents, respectively, as  
86 reported by the World Population Review webpage (World Population Review, 2020). Casablanca  
87 is located in the central-western part of the country on the Atlantic Ocean coast (Fig. 1). In  
88 economic and demographic terms, Casablanca is one of the most important cities in Africa and is  
89 the largest city in the Maghreb. Marrakech is a large city in the Kingdom of Morocco. It is the chief  
90 town of the inland mid-southwestern region of Marrakech-Safi and located to the north of the  
91 piedmont of the snow-capped Atlas Mountains (Fig. 1). With the COVID-19 crisis, the cities of  
92 Casablanca and Marrakech account together for more than 50% of the people infected. On the 20<sup>th</sup>  
93 April 2020, it has been reported that the region of Casablanca-Settat has reached exactly 840 cases  
94 leading the most regions affected by COVID-19, it is followed by the region of Marrakech-Safi  
95 which reached 739 cases of Coronavirus. Moreover, Casablanca and Marrakech are often chosen  
96 for air pollution researches as they are the urban areas where serious pollution concerns may be

97 met, especially with the important population rate increase between 2004 and 2014, this rate  
98 reaches 11% in Casablanca and 12% in Marrakech.  
99

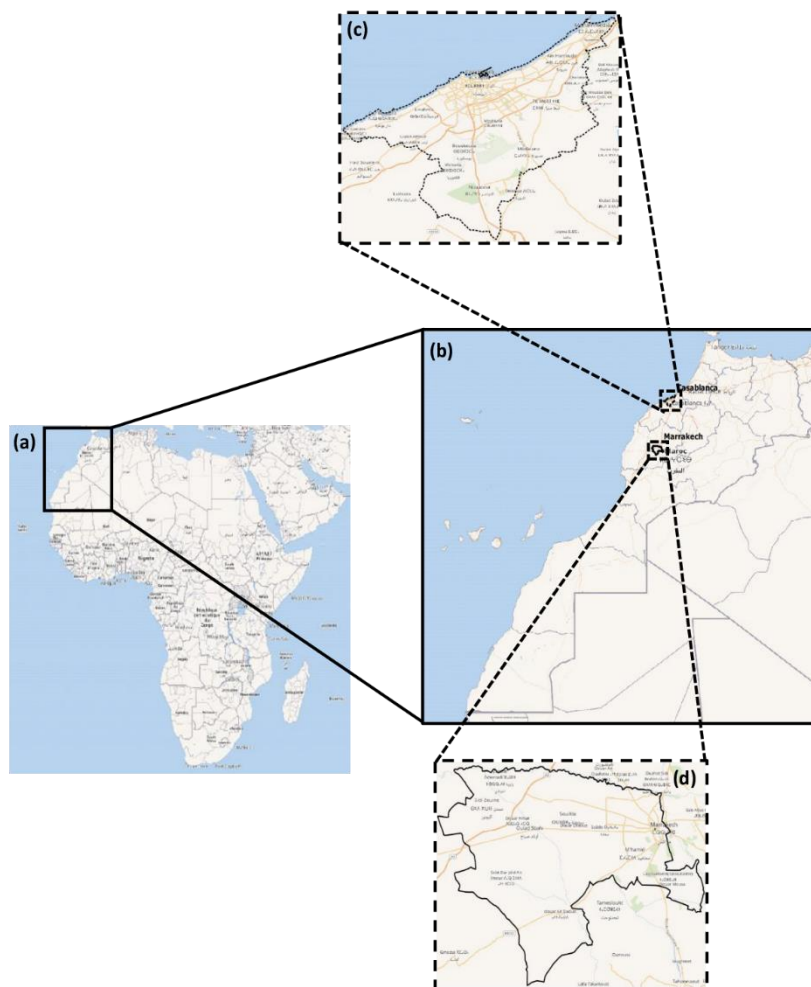

**Figure 1.:** Location of the study area. (a) Africa, (b) Morocco, (c) Casablanca, (d) Marrakech

## 100 **2.2. Air quality, health, and population data**

101 The number of daily confirmed COVID-19 cases and death in Morocco were collected from the  
102 official website set by the ministry of health for that purpose (Ministry of Health, 2020). Air quality  
103 data (daily concentrations of NO<sub>2</sub>, PM<sub>10</sub>, and CO) recorded in air quality stations, were gathered  
104 from the National Weather Service in charge of air quality management in Morocco. PM<sub>10</sub>  
105 concentrations were then converted to PM<sub>2.5</sub> data for each station, using a conversion factor of 0.4  
106 (Ait Bouh et al., 2013). We focused on NO<sub>2</sub>, PM<sub>2.5</sub>, and CO because they are traffic-related air

107 pollutants whose emissions must obviously reduce as a result of the national traffic ban and home  
108 quarantine in Morocco during the lockdown.

109 Up to date city-level demographics are obtained from the World Population Review webpage  
110 (World Population Review, 2020). Country-level air quality related mortality including that  
111 incidental to chronic disease is collected from the Institute for Health Metrics and Evaluation  
112 (IHME) (IHME, 2017).

### 113 **2.3. Methods**

114 To assess air pollution reduction due to the lockdown, we used a difference-in-difference  
115 approach that we validated through the non-parametric approach proposed by Theil and Sen for  
116 univariate time series (Sen, 1968; Theil, 1950). Specifically, we defined the before quarantine  
117 period as between the 16<sup>th</sup> February and the 19<sup>th</sup> March 2020 and the during quarantine as between  
118 the 20<sup>th</sup> March and 20<sup>th</sup> April 2020. We assessed changes in air quality during vs. before the  
119 quarantine period in 2020 and compared these with corresponding changes in the same lunar  
120 calendar periods in 2016-2019. We assessed the statistical significance of the obtained trends using  
121 the modified Mann-Kendall test proposed by Hamed and Ramachandra Rao for autocorrelated time  
122 series (Hamed and Ramachandra Rao, 1998). The test is performed at a significance level of 5%.

123 In order to quantify the impact of the found change in air quality on health, we calculated the  
124 avoided cause-specific mortality attributable to the decreases in NO<sub>2</sub> and PM<sub>2.5</sub> over the study area  
125 based on the concentration-response functions from previous studies by (Chen et al., 2018, 2017)  
126 and the cause-specific mortality data from the IHME in 2017 (IHME, 2017). In addition to total  
127 non-accidental mortality, the cause-specific mortality for cardiovascular disease, hypertensive  
128 disease, stroke, chronic respiratory diseases, and chronic obstructive pulmonary disease (COPD)  
129 was also calculated. The attributable fraction (AF) method was used to estimate the daily avoided  
130 cause-specific mortality from air pollution reduction as done by (Chen et al., 2020). AF is defined

131 as follows:  $AF = 1 - e^{-\beta \Delta c}$   $\beta$  is the cause-specific coefficient of the CRF, it is expressed as the  
132 percentage change in daily mortality associated with a  $10 \mu\text{g}/\text{m}^3$  increase in daily  $\text{NO}_2$  or  $\text{PM}_{2.5}$ .  $\beta$   
133 values are available in the study by (Chen et al., 2020).  $\Delta c$  is the air quality changes due to the  
134 quarantine. AF is then multiplied by the daily cause-specific number of deaths and the total number  
135 of days during the quarantine period (32 days) to estimate the cause-specific avoided deaths.

### 136 **3. Results and discussion**

#### 137 **3.1. Improvement in air quality**

138 Graphs in figure 2 show the evolution of  $\text{NO}_2$ ,  $\text{PM}_{2.5}$ , and CO in the cities of Casablanca and  
139 Marrakech before and during the quarantine. They also mention related Theil-Sen (TS) slopes and  
140 their significance (when in bold, they are significant). TS represents the magnitude of the trend  
141 during one day from the study period which counts 65 days. Multiplying this number of days by  
142 the TS gives the magnitude of the trend during the whole study period. TS assessment helps to  
143 validate the difference-in-difference estimate (DDE) presented in table 1. Overall, TS and DDE  
144 have the same order of magnitude.

145 Hence, DDE shows that, because of the quarantine,  $\text{NO}_2$  dropped by  $-12 \mu\text{g}/\text{m}^3$  in Casablanca  
146 and  $-7 \mu\text{g}/\text{m}^3$  in Marrakech.  $\text{PM}_{2.5}$  dropped by  $-18 \mu\text{g}/\text{m}^3$  in Casablanca and  $-14 \mu\text{g}/\text{m}^3$  in Marrakech.  
147 CO dropped by  $-0.04 \text{mg}/\text{m}^3$  in Casablanca and  $-0.12 \text{mg}/\text{m}^3$  in Marrakech. All TS calculated slopes  
148 for the 2020 period are statistically significant and confirm the negative trends and order of  
149 magnitude of the DDE. TS slopes for the period 2016-2019 are not statistically significant.

150 These results are in complete agreement with the worldwide studies that confirmed the systematic  
151 link between COVID-19 lockdown and improvement in air quality levels.

152

153

154

155

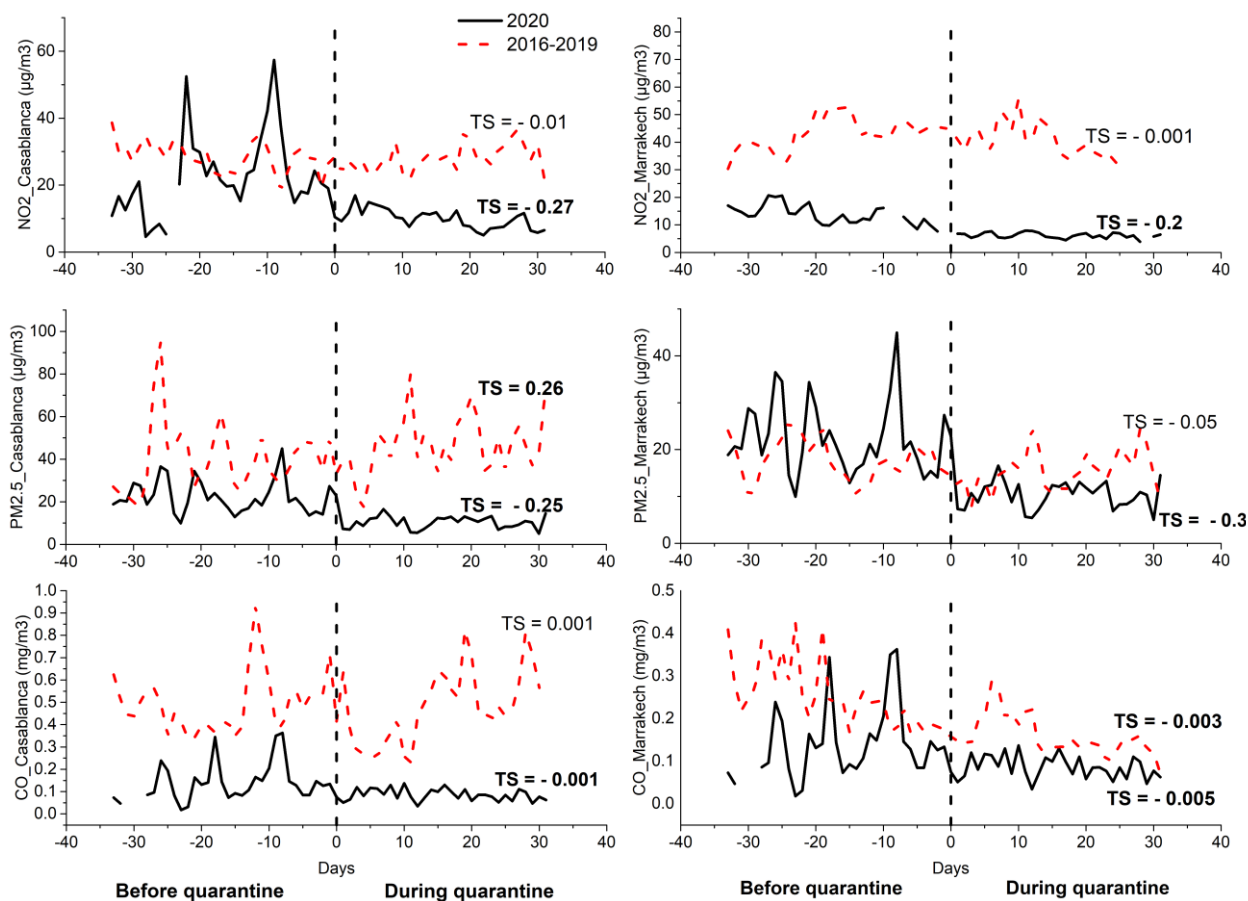

**Figure 2.:** Air pollution changes due to the quarantine in Casablanca and Marrakech using TS  
**Bold character:** statistically significant

156

**Table 1.:** Air pollution changes due to the quarantine in Casablanca and Marrakech using DDE

|                         | During vs before in 2020 |           | During vs before in 2016-2019 |           | Difference in difference |           |
|-------------------------|--------------------------|-----------|-------------------------------|-----------|--------------------------|-----------|
|                         | Casablanca               | Marrakech | Casablanca                    | Marrakech | Casablanca               | Marrakech |
| <b>NO<sub>2</sub></b>   | -12.5                    | -7.5      | -0.28                         | -0.74     | -12.21                   | -6.76     |
| <b>PM<sub>2.5</sub></b> | -11.63                   | -16.26    | 5.87                          | -2.48     | -17.5                    | -13.78    |
| <b>CO</b>               | -0.06                    | -0.21     | -0.02                         | -0.1      | -0.04                    | -0.12     |

157 **3.2. COVID-19 vs air quality daily deaths**

158 Figure 3 (a) and (b) show the cumulative number of deaths by COVID-19 in Morocco and the  
 159 change in the number of daily mortalities, respectively. The results prove that the number of deaths  
 160 increased between the 23<sup>rd</sup> March and 4<sup>th</sup> May and decreased notably since then. The rate of change  
 161 in daily mortality decreases with time and reached the nil value by the 20<sup>th</sup> of June.



162 According to the global report “Toxic Air: The Price of Fossil Fuels” of the international NGO  
163 Greenpeace MENA, Morocco is within a lengthy list of countries that suffer relatively from high  
164 estimated numbers of deaths annually due to air quality degradation. This number is estimated at  
165 5,100 in 2018 (Farrow, A., Miller, K.A. & Myllyvirta, 2020). Dividing this value over 365 days  
166 helps obtain the daily average deaths due to air pollution and yields 14 deaths every day. This  
167 average fixed value was plotted against the daily reported deaths due to COVID-19 in Morocco  
168 (Fig. 4). Moreover, it is worth noting that outdoor air pollution by particulate matter death rate in  
169 Morocco is estimated at 63,1 per 100000 inhabitants (Ritchie, 2019). That of Covid-19 is of 0.59  
170 per 100000 inhabitants as estimated by the Coronavirus resource center of the Johns Hopkins  
171 University (<https://coronavirus.jhu.edu/data/mortality>). All these results show a tremendous  
172 difference in deaths caused by COVID-19 and air pollution in Morocco.

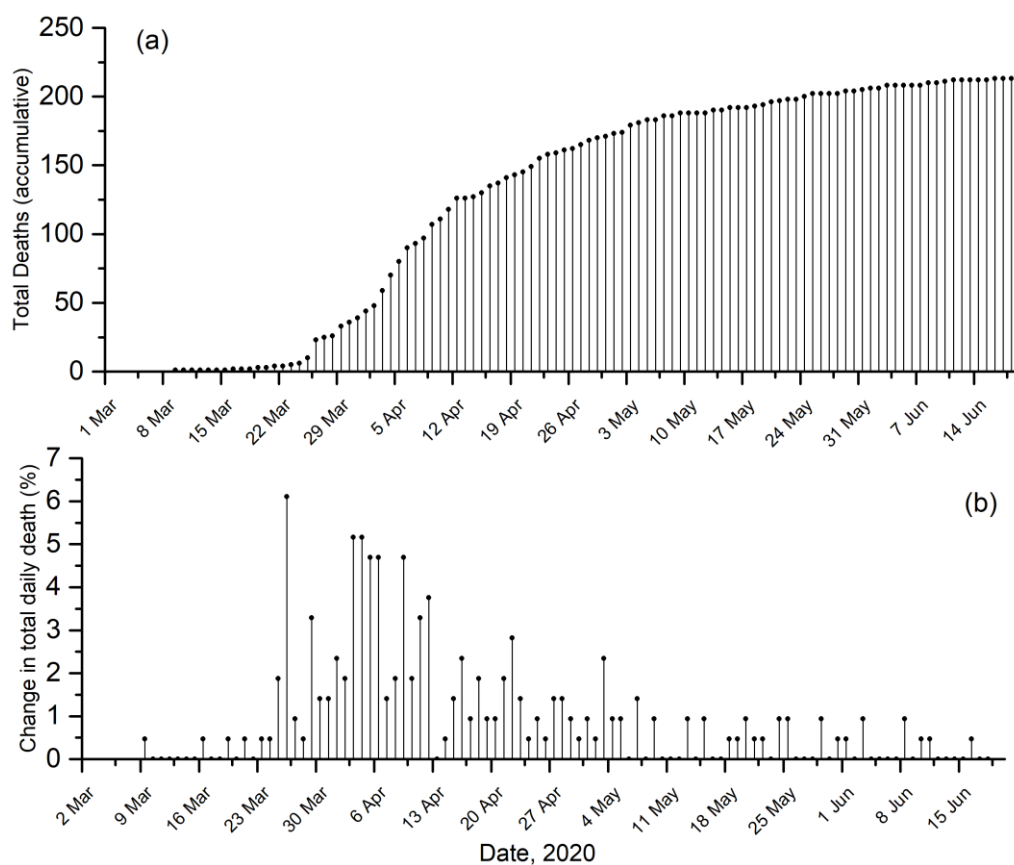

**Figure 3.:** (a) Cumulative number of deaths by COVID-19 in Morocco (b) Change in the number of daily mortalities

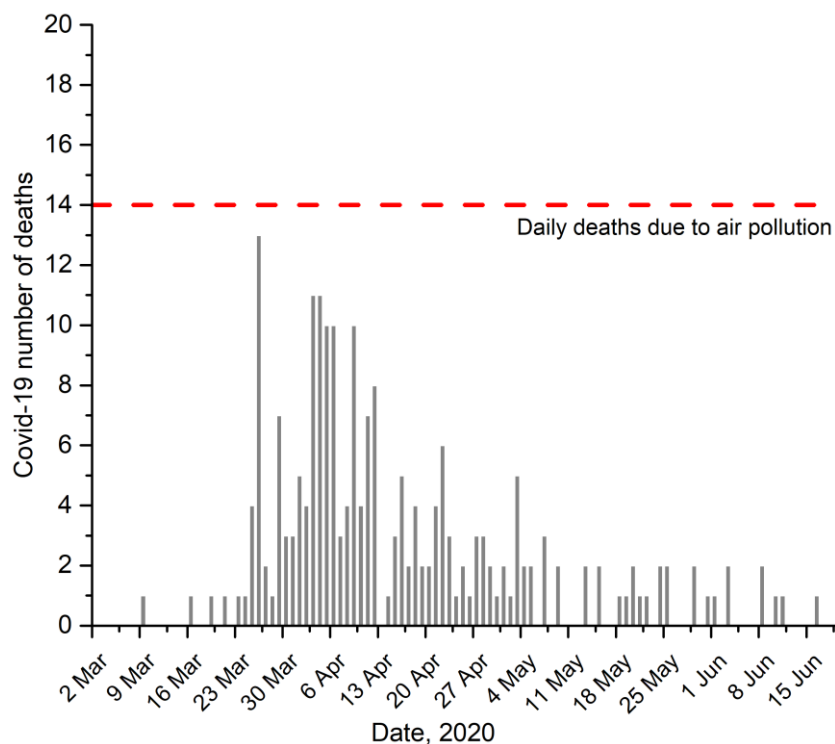

**Figure 4.:** Daily deaths due to COVID-19 vs. averaged daily deaths due to poor air quality

173 **3.3. Did COVID-19 save lives?**

174 Table 2 shows the avoided cause-specific deaths due to air pollution reduction because of the  
175 COVID-19 home quarantine in Casablanca and Marrakech. We estimate that reduction in  $\text{NO}_2$   
176 during the quarantine period avoided a total of 185  $\text{NO}_2$  related deaths (95% CI 145–223) in  
177 Casablanca and 30 (95% CI 24–37) in Marrakech. Reduction in  $\text{PM}_{2.5}$  avoided a total of 48  $\text{PM}_{2.5}$   
178 related deaths (95% CI 70–89) in Casablanca and 15 (95% CI 10–19) in Marrakech. More than  
179 60% of the avoidable deaths were from cardiovascular diseases. Cause-specific CRFs from single-  
180 pollutant models were used (Chen et al., 2020, 2017). Our results should be interpreted carefully  
181 because of the potential common impacts  $\text{NO}_2$  and  $\text{PM}_{2.5}$  may have on health. The risk of double  
182 counting is minor because, as suggested by the literature, effect estimates for  $\text{NO}_2$  and  $\text{PM}_{2.5}$  were  
183 similar between single-pollutant and two-pollutant models (Anenberg et al., 2010; Chen et al.,  
184 2018).

185 Our findings imply that interventions to contain the COVID-19 outbreak led to improvements in  
 186 air quality that brought health benefits in non-COVID-19 deaths, which could potentially have  
 187 highly exceeded the current confirmed deaths attributable to COVID-19 in Morocco (229 deaths  
 188 as of July 3, 2020).

**Table 2.:** Avoided cause-specific deaths (95% confidence interval) due to air pollution reduction because of the home quarantine in Casablanca and Marrakech

|                              | Casablanca   |           | Marrakech |           |
|------------------------------|--------------|-----------|-----------|-----------|
|                              | NO2          | PM2.5     | NO2       | PM2.5     |
| Total                        | 185(145,223) | 48(70,89) | 30(24,37) | 15(10,19) |
| Cardiovascular Disease       | 96(76,126)   | 45(30,59) | 16(12,21) | 10(6,13)  |
| Hypertensive heart disease   | 8(5,11)      | 4(1,6)    | 1(1,2)    | 1(0,1)    |
| Chronic respiratory diseases | 8(6,10)      | 3(2,5)    | 1(1,2)    | 1(0,1)    |
| Stroke                       | 23(13,30)    | 4(2,5)    | 9(5,13)   | 2(1,3)    |
| COPD                         | 5(7,9)       | 2(3,4)    | 1(1,1)    | 1(0,1)    |

Note: Home quarantine is the period between 20<sup>th</sup> March and 20<sup>th</sup> April 2020

189

#### 190 4. Conclusion

191

192 In the present article, the effect of the imposed lockdown in Morocco in order to restrict the rapid  
 193 spread of COVID-19 pandemic, on the air quality has been assessed based on NO<sub>2</sub>, PM<sub>2.5</sub> and CO  
 194 concentrations. Our estimates suggest that the undertaken lockdown led to improvements in air  
 195 quality that brought health benefits in non-COVID-19 deaths. Specifically, our findings show the  
 196 human health benefits related to cardiovascular diseases mortality that can be achieved if control  
 197 measures are taken to reduce emissions from vehicles. Traffic restrictions or efforts to accelerate  
 198 the transition to electric vehicles are good examples of these measures.

199 The results highlighted in the present work are not isolated and are in agreement with many other  
 200 studies throughout the world. Thus, this paper and similar ones help to raise awareness about our  
 201 responsibility towards the environment. It may also help to consider whether the COVID-19  
 202 lockdown scenario would be an efficient measure for preserving the environment and enhancing  
 203 life quality in the urban ecosystem. However, cost effectiveness is one of the keys for policymakers  
 204 to implement any control measure mainly that the lockdown has caused lower mobility and

205 economic activity and shrinking the economy is not a sustainable solution to encounter the  
206 environmental challenge.

207 Moreover, the meteorological forcing is to take into consideration in concluding from such a  
208 study as they impact pollutants dispersion and concentration. Overall, the interlinkages between  
209 COVID-19, economy and climate are complex and depend on the climatic conditions, the duration  
210 of the emergency and reactions to it. Yet, like every crisis, the COVID-19 pandemic offers an  
211 important opportunity to draw lessons and to reconsider the way we treat the environment and the  
212 ecosystems.

## 213 **5. References**

- 214 Ait Bouh, H., Benyaich, F., Bounakhla, M., Noack, Y., Tahri, M., Zahry, F., 2013. Seasonal variations of  
215 the atmospheric particles and its chemical components in Meknes city Morocco. *J. Mater. Environ.*  
216 *Sci.*
- 217 Anenberg, S.C., Horowitz, L.W., Tong, D.Q., West, J.J., 2010. An estimate of the global burden of  
218 anthropogenic ozone and fine particulate matter on premature human mortality using atmospheric  
219 modeling. *Environ. Health Perspect.* 118, 1189–1195. <https://doi.org/10.1289/ehp.0901220>
- 220 Chen, K., Wang, M., Huang, C., Kinney, P.L., Anastas, P.T., 2020. Air pollution reduction and mortality  
221 benefit during the COVID-19 outbreak in China. *Lancet Planet. Heal.* [https://doi.org/10.1016/S2542-](https://doi.org/10.1016/S2542-5196(20)30107-8)  
222 [5196\(20\)30107-8](https://doi.org/10.1016/S2542-5196(20)30107-8)
- 223 Chen, R., Yin, P., Meng, X., Liu, C., Wang, L., Xu, X., Ross, J.A., Tse, L.A., Zhao, Z., Kan, H., Zhou, M.,  
224 2017. Fine particulate air pollution and daily mortality: A nationwide analysis in 272 Chinese cities.  
225 *Am. J. Respir. Crit. Care Med.* <https://doi.org/10.1164/rccm.201609-1862OC>
- 226 Chen, R., Yin, P., Meng, X., Wang, L., Liu, C., Niu, Y., Lin, Z., Liu, Y., Liu, J., Qi, J., You, J., Kan, H.,  
227 Zhou, M., 2018. Associations between ambient nitrogen dioxide and daily cause-specific mortality.  
228 *Epidemiology.* <https://doi.org/10.1097/EDE.0000000000000829>
- 229 Farrow, A., Miller, K.A. & Myllyvirta, L., 2020. Toxic Air: The Price of Fossil Fuels. Greenpeace  
230 Southeast Asia 44.
- 231 Hamed, K.H., Ramachandra Rao, A., 1998. A modified Mann-Kendall trend test for autocorrelated data. *J.*  
232 *Hydrol.* 204, 182–196. [https://doi.org/10.1016/S0022-1694\(97\)00125-X](https://doi.org/10.1016/S0022-1694(97)00125-X)
- 233 IHME, 2017. GBD Compare [WWW Document]. URL <https://vizhub.healthdata.org/gbd-compare/>
- 234 Isaifan, R.J., 2020. The dramatic impact of coronavirus outbreak on air quality: Has it saved as much as it  
235 has killed so far? *Glob. J. Environ. Sci. Manag.* <https://doi.org/10.22034/gjesm.2020.03.01>
- 236 Khan, N., Naushad, M., 2020. Effects of Corona Virus on the World Community. *SSRN Electron. J.*  
237 <https://doi.org/10.2139/ssrn.3532001>

- 238 Khomsi, K., Najmi, H., Chelhaoui, Y., Souhaili, Z., 2020. The contribution of large-scale atmospheric  
239 patterns to pm10 pollution: The new saharan oscillation index. *Aerosol Air Qual. Res.*  
240 <https://doi.org/10.4209/aaqr.2019.08.0401>
- 241 Mahato, S., Pal, S., Ghosh, K.G., 2020. Effect of lockdown amid COVID-19 pandemic on air quality of  
242 the megacity Delhi, India. *Sci. Total Environ.* <https://doi.org/10.1016/j.scitotenv.2020.139086>
- 243 Martins, D., 2020. Italy air pollution plunges amid national COVID-19 quarantine [WWW Document].  
244 Weather Netw.
- 245 Ministry of Health, 2020. The Official Coronavirus Portal in Morocco [WWW Document]. URL  
246 <http://www.covidmaroc.ma/pages/Accueil.aspx>
- 247 Newburger, E., 2020. Air pollution drops 30% in Northeast US as coronavirus lockdown slows travel:  
248 NASA [WWW Document]. URL [https://www.cnn.com/2020/04/09/coronavirus-air-pollution-](https://www.cnn.com/2020/04/09/coronavirus-air-pollution-plummets-30percent-in-northeast-us-amid-lockdowns.html)  
249 [plummets-30percent-in-northeast-us-amid-lockdowns.html](https://www.cnn.com/2020/04/09/coronavirus-air-pollution-plummets-30percent-in-northeast-us-amid-lockdowns.html)
- 250 Otmani, A., Benchrif, A., Tahri, M., Bounakhla, M., Chakir, E.M., El Bouch, M., Krombi, M., 2020.  
251 Impact of Covid-19 lockdown on PM10, SO2 and NO2 concentrations in Salé City (Morocco). *Sci.*  
252 *Total Environ.* 735, 139541. <https://doi.org/10.1016/j.scitotenv.2020.139541>
- 253 Ritchie, H., 2019. Outdoor Air Pollution.
- 254 Sen, P.K., 1968. Estimates of the Regression Coefficient Based on Kendall's Tau. *J. Am. Stat. Assoc.* 63,  
255 1379. <https://doi.org/10.2307/2285891>
- 256 Theil, H., 1950. A rank-invariant method of linear and polynomial regression analysis. I. *Nederl. Akad.*  
257 *Wetensch., Proc.* 53, 386–392. <https://doi.org/10.1007/978-94-011-2546-8>
- 258 Universitat Politècnica de València, 2020. Air pollution declines in Spain after implementation of  
259 measures to fight [WWW Document]. URL [https://phys.org/news/2020-03-air-pollution-declines-](https://phys.org/news/2020-03-air-pollution-declines-spain-covid-.html)  
260 [spain- covid-.html](https://phys.org/news/2020-03-air-pollution-declines-spain-covid-.html)
- 261 Wang, Pengfei, Chen, K., Zhu, S., Wang, Peng, Zhang, H., 2020. Severe air pollution events not avoided  
262 by reduced anthropogenic activities during COVID-19 outbreak. *Resour. Conserv. Recycl.*  
263 <https://doi.org/10.1016/j.resconrec.2020.104814>
- 264 WHO, 2020a. WHO Coronavirus Disease (COVID-19) Dashboard [WWW Document]. URL  
265 <https://covid19.who.int/>
- 266 WHO, 2020b. Mortality and burden of disease from ambient air pollution [WWW Document]. URL  
267 [https://www.who.int/gho/phe/outdoor\\_air\\_pollution/burden\\_text/en/](https://www.who.int/gho/phe/outdoor_air_pollution/burden_text/en/)
- 268 World Population Review, 2020. World Population Review [WWW Document]. URL  
269 <https://worldpopulationreview.com/>
- 270
